# Supplementary material for: Novel Mn4-Co2 nanocluster@photosensitizers/SalenCo(iii) catalyze the copolymerization of carbon dioxide and propylene oxide
Source: Royal Society of Chemistry journal article supplement (doi:10.1039/d3ra01742g), 2023-01-01
Supplement: d3ra01742g1.pdf [file d3ra01742g1.pdf]

## Supporting Information

### **A Novel Mn<sub>4</sub>-Co<sub>2</sub> nanocluster@photosensitizers/ SalenCo(III) catalyze the copolymerization of carbon dioxide and propylene oxide**

ZhiWei Yang, LongChao Du<sup>a</sup>

<sup>a</sup>Address correspondence to Longchao Du, School of Chemistry and Chemical Engineering, the Key Laboratory of Environment-friendly Polymer Materials of Anhui Province & Key Laboratory of Structure and Functional Regulation of Hybrid Materials (Anhui University), Ministry of Education, Hefei, 230601, PRC.

E-mail address: [dulongchao@sina.com](mailto:dulongchao@sina.com)

#### **1.1 Measurement**

The <sup>1</sup>H-NMR was recorded on a nuclear magnetic resonance (NMR) spectrometer (avanceii, 400MHz). Samples were dissolved in CDCl<sub>3</sub> or CD<sub>3</sub>SOCD<sub>3</sub> with tetramethylsilane as an internal standard. The Mn, Co content of the catalysts was quantified by inductively coupled plasma optical emission spectroscopy (ICP-AES; ICPS-8100, Shimadzu and ICP-MS; iCAPQ, Thermo Scientific). The ultraviolet visible absorption spectrum was recorded on Shimadzu UV-3600 spectrophotometer. The matrix assisted laser desorption/ionization time-of-flight was measured using a Bruker Autoflex (MALDI-TOF) mass spectrometer III.

#### **1.2 Electrochemical measurements**

The three-electrode system connected to the electrochemical workstation of chinstruments (CHI600E) is used for electrochemical measurement. Use glass carbon disk as working electrode (diameter 3mm, just polished). Use a platinum plate as the counter electrode (diameter 3mm, just polished). The reference electrode is Ag/AgCl<sub>2</sub>

---

electrode (0.01M AgNO<sub>3</sub>, 0.1 M Bu<sup>n</sup><sub>4</sub>NPF<sub>6</sub> in acetonitrile). The electrolyte solution is 0.1M Bu<sup>n</sup><sub>4</sub>NPF in 1,2-dichloroethane. Before the measurement, the solvent shall be purged with saturated argon for more than 30 minutes to remove oxygen to avoid affecting the test results. During the measurement, argon is continuously injected. Before dissolving the cluster **I**, record the background voltammogram of the electrolyte. The reported potential is internally referenced to NHE and calibrated by the possibility of ferrocene/ferrocene measured under the same conditions. Scanning rate: 100mV/s. The arrow shows the scanning direction. Using the Nernst equation  $\{E_{\text{NHE}}(\text{V}) = E_{\text{Ag}/\text{AgCl}}(\text{V}) + 0.197 \text{ V}\}$ , all potentials are calculated according to the normal hydrogen electrode (NHE) scale.

### **1.3. Structure determination.**

The data collection for single crystal X-ray diffraction was carried out on a Bruker Smart APEX II CCD diffractometer at 293 K, the usage of a Cu-K $\alpha$  radiation ( $\lambda = 1.54186 \text{ \AA}$ ). Data rate reductions and absorption corrections had been carried out the usage of the SAINT and SADABS programs, respectively. The structure used to be solved through direct methods and sophisticated with full-matrix least squares on F2 the usage of the SHELXTL software program package. All non-hydrogen atoms have been sophisticated anisotropically, and all the hydrogen atoms have been set in geometrically calculated positions and subtle isotropically the usage of a driving model. X-ray photoelectron spectroscopy (XPS) using the Thermo EscaLab Xi+X-ray photoelectron spectrometer.

### **1.4. Characterization of compound 1, compound 2, S1, S2, cluster I**

Compound 1:

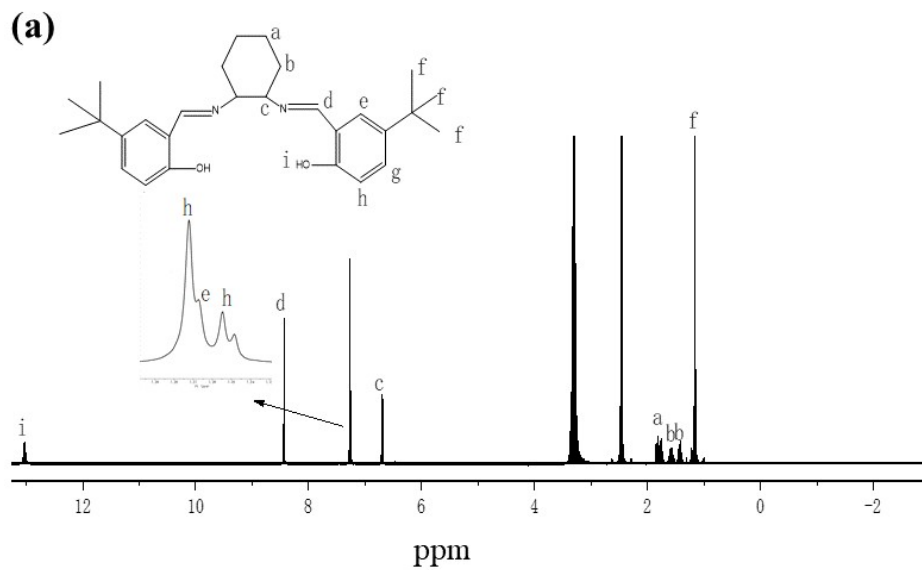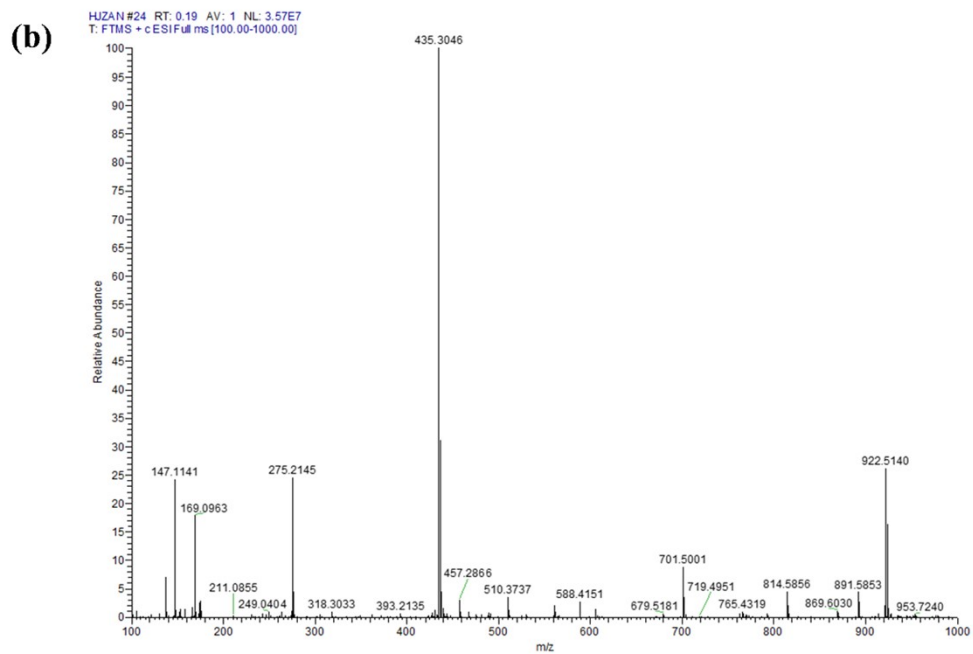

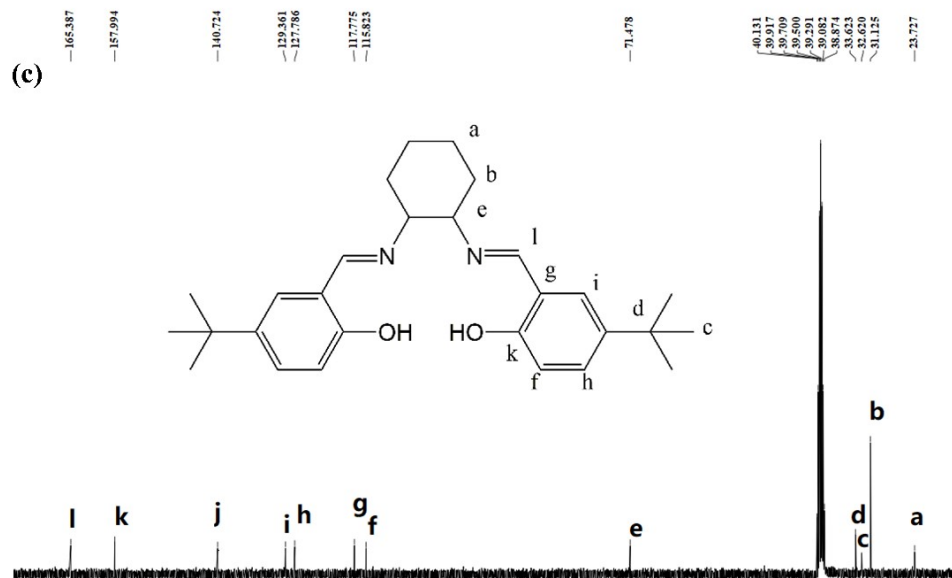

Fig. S1 (a) Compound 1  $^1\text{H}$  NMR (400 MHz, DMSO- $d_6$ ); (b) Compound 1 mass spectrum; (c) Compound 1  $^{13}\text{C}$  NMR (400 MHz, DMSO- $d_6$ )

Compound 2:

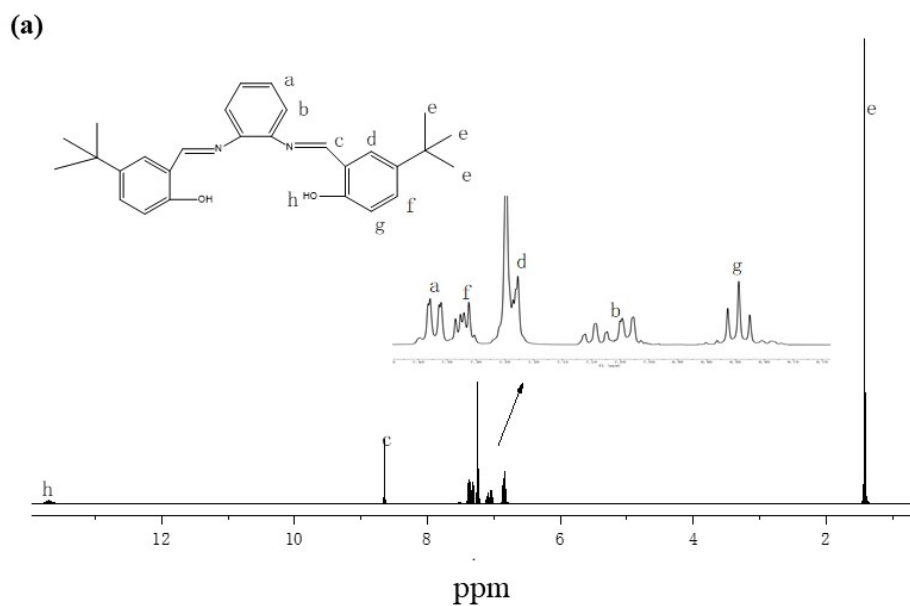

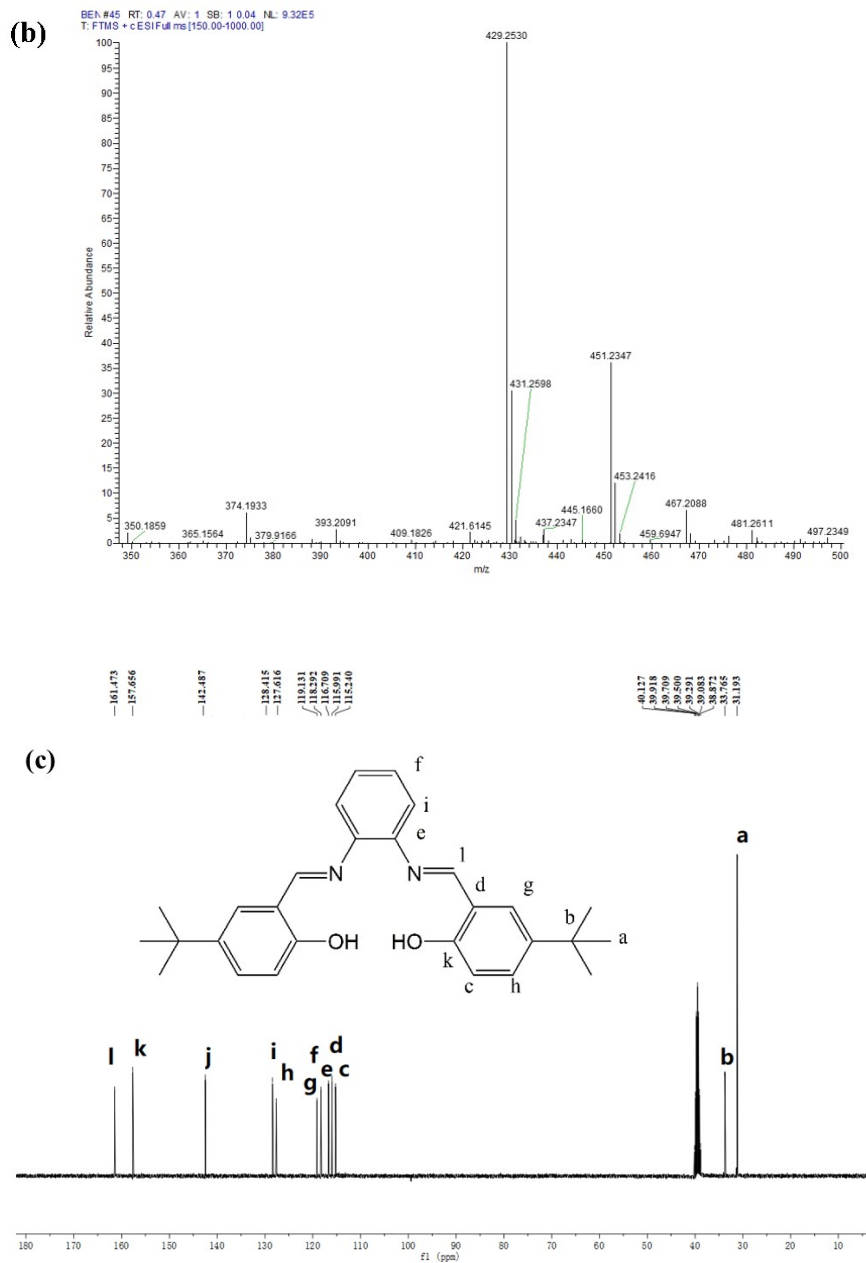

**Fig. S2** (a) Compound 2  $^1\text{H}$  NMR (400 MHz, Chloroform- $d$ ); (b) Compound 2 mass spectrum; (c) Compound 2  $^{13}\text{C}$  NMR (400 MHz, DMSO- $d_6$ )

S1:

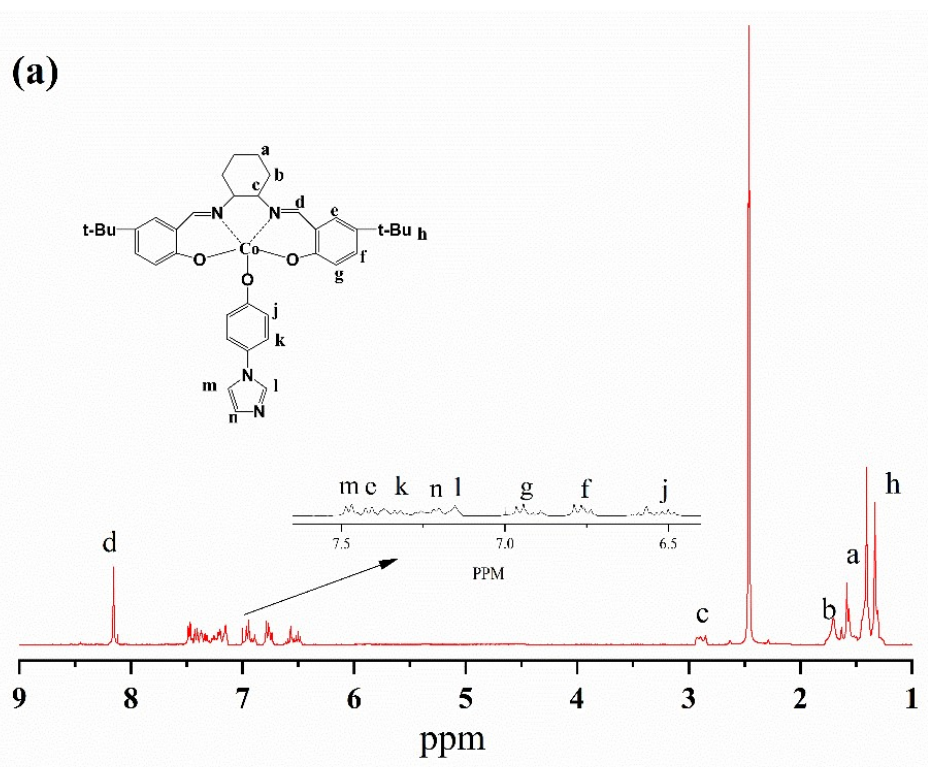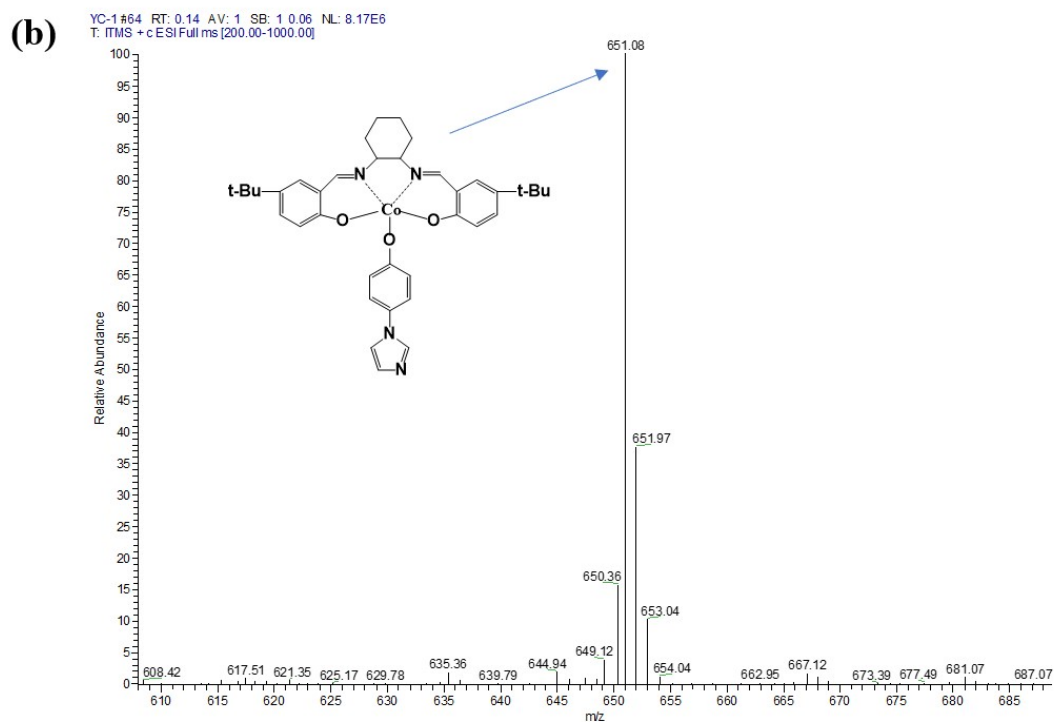

Fig. S3 (a) S1  $^1\text{H}$  NMR (400 MHz, DMSO- $d_6$ ); (b) S1 mass spectrum

S2:

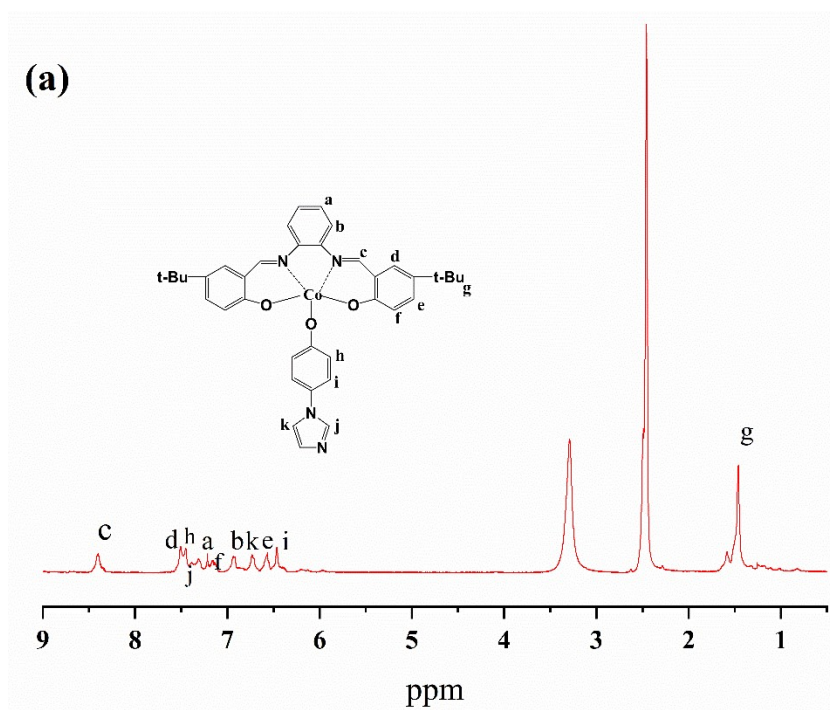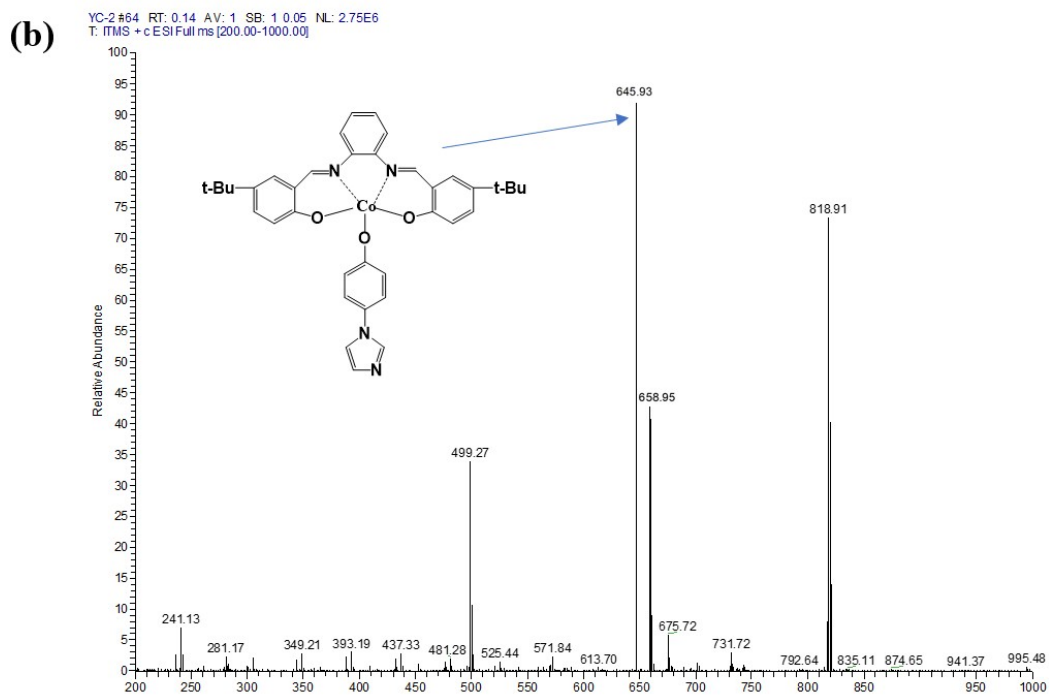

Fig. S4 (a) S2  $^1\text{H}$  NMR (400 MHz, DMSO- $d_6$ ); (b) S2 mass spectrum

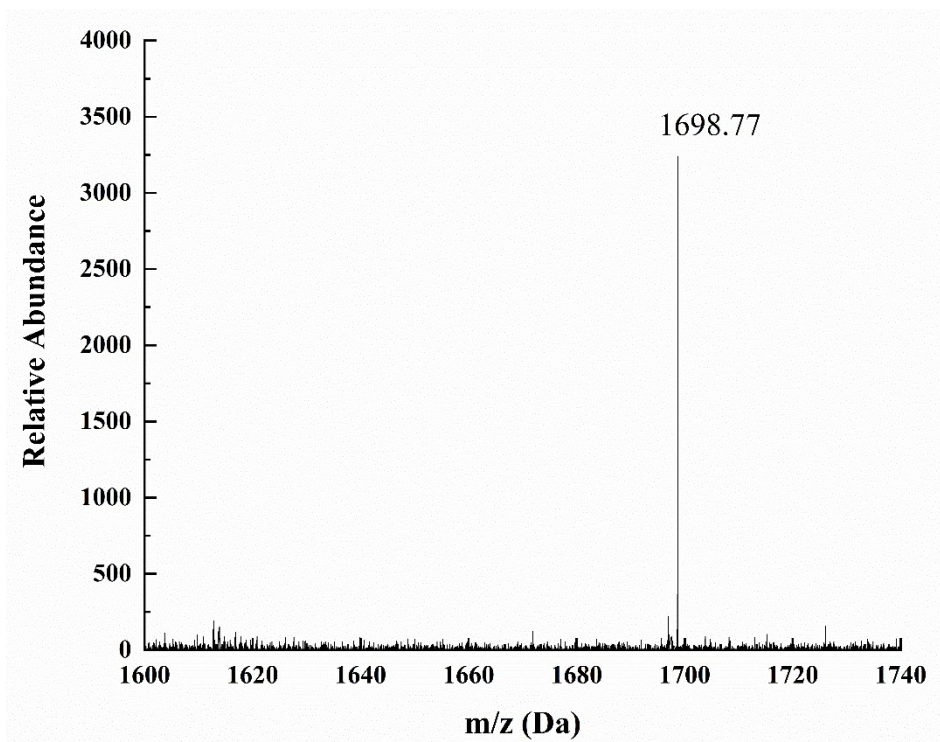

Fig. S5. The MALDI mass spectra analysis of the cluster I.  
crystals.

### 1.5 Polymer $^1\text{H}$ -NMR and composite catalyst characterisation

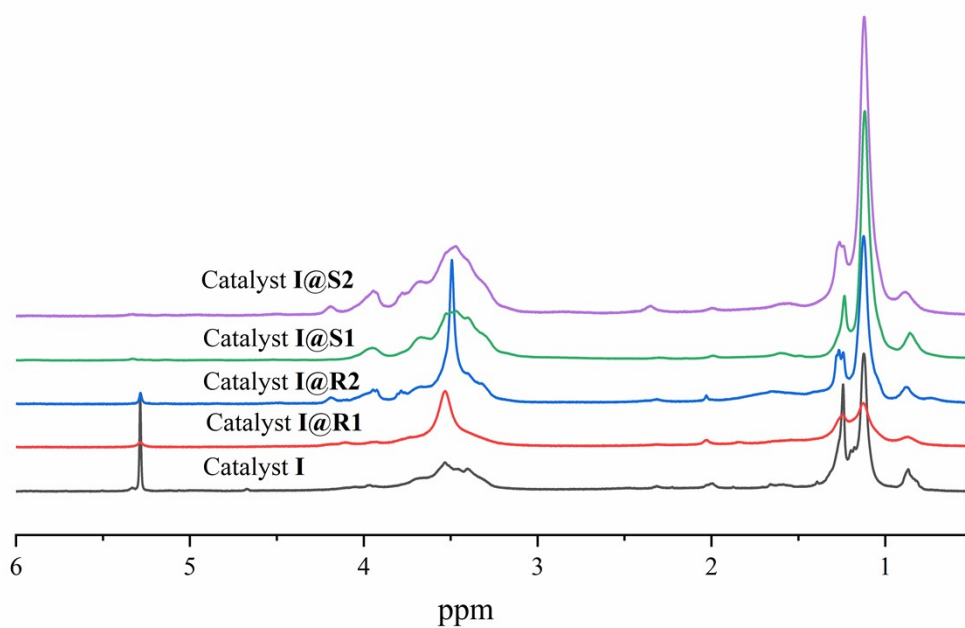



---

**Fig. S6.** The  $^1\text{H}$  NMR of the copolymerization products for **I**, **I@R1**, **I@R2**, **I@S1** and **I@S2** without light sources, 60 °C, 6h and 2 MPa  $\text{CO}_2$ .

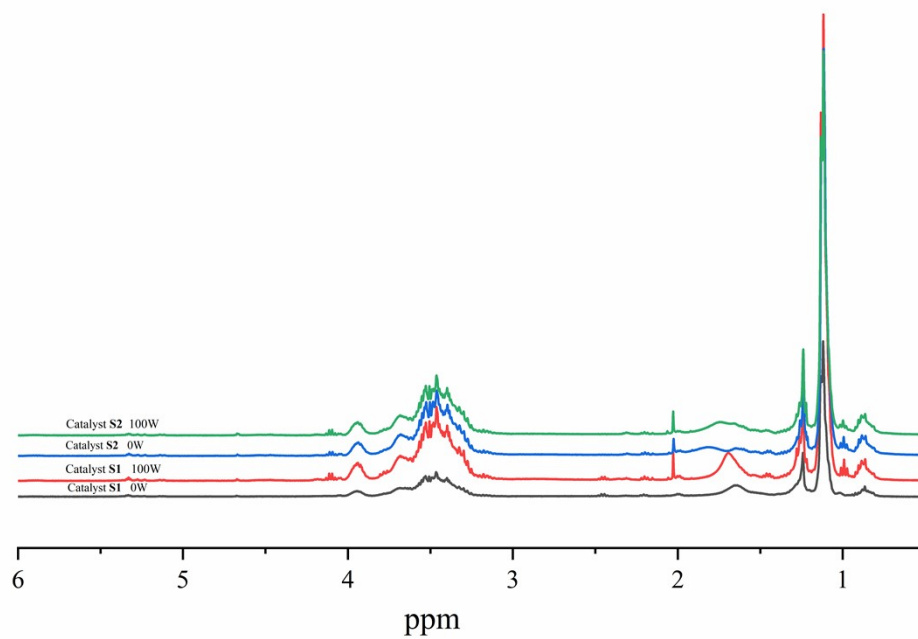

**Fig. S7** The  $^1\text{H}$  NMR of the copolymerization products for **S1** and **S2** with 0W or 100W light sources at 60 °C, 6h and 2 MPa  $\text{CO}_2$ .

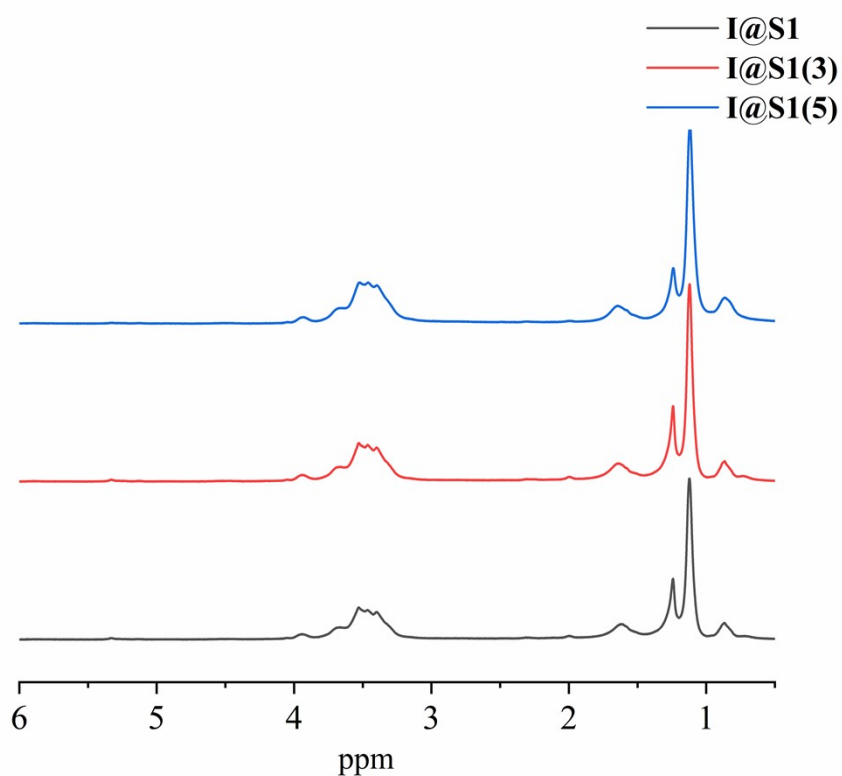

**Fig. S8** The <sup>1</sup>H NMR of the copolymerization products for I@S1, I@S1(3) and I@S1(5) with 100W light sources, 60 °C, 6h and 2 MPa CO<sub>2</sub>.

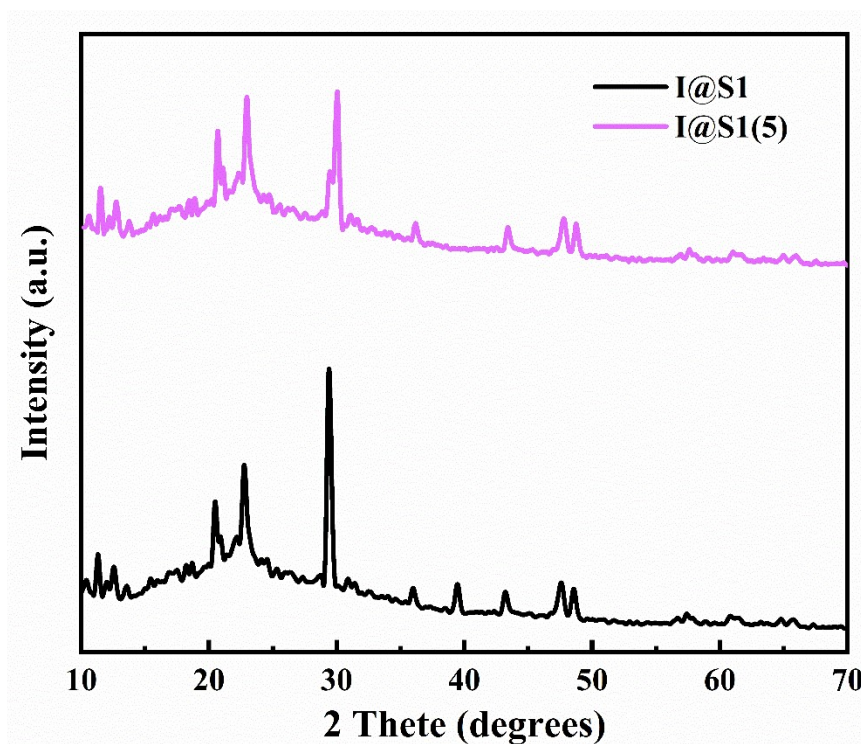

**Fig. S9** XRD patterns of I@S1 and I@S1(5)

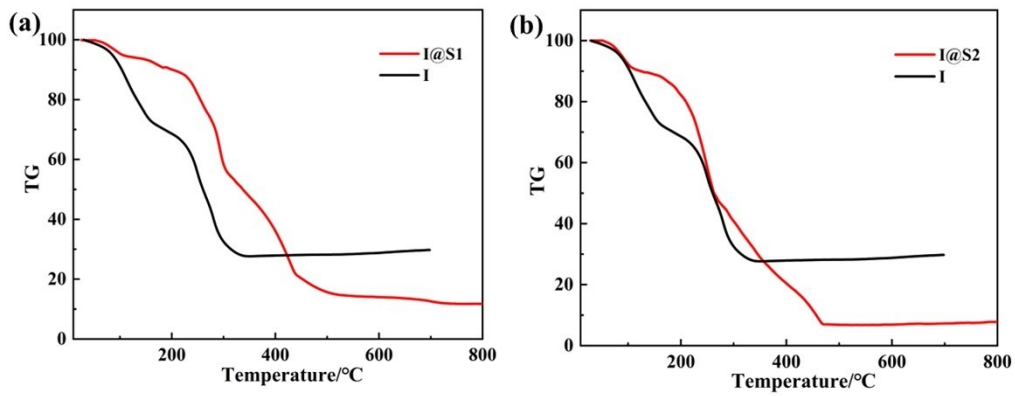

**Fig. S10** TG analysis of composite catalysts: (a) I, I@S1 and (b) I, I@S2.

## 1.6 Filter Information

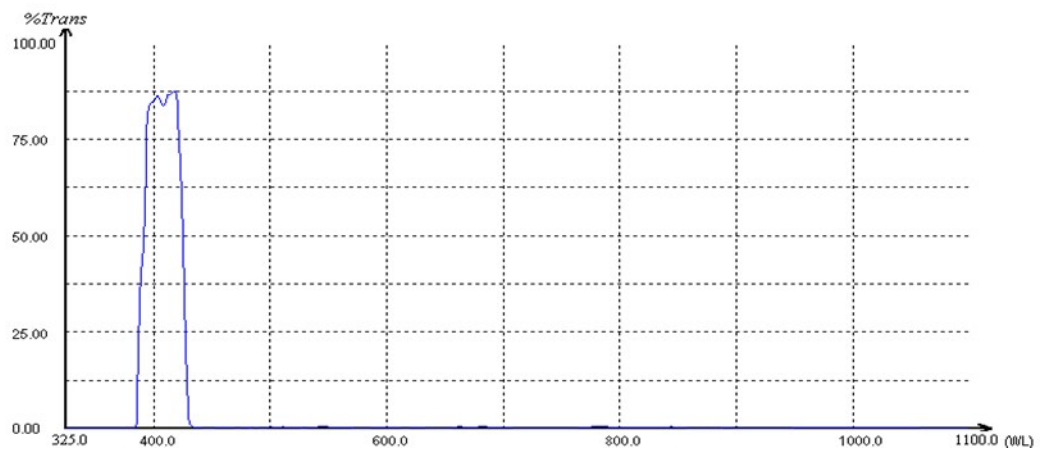

**Fig. S11** The light transmittance of the filter can reach about 90% in the range of 395nm~421nm.

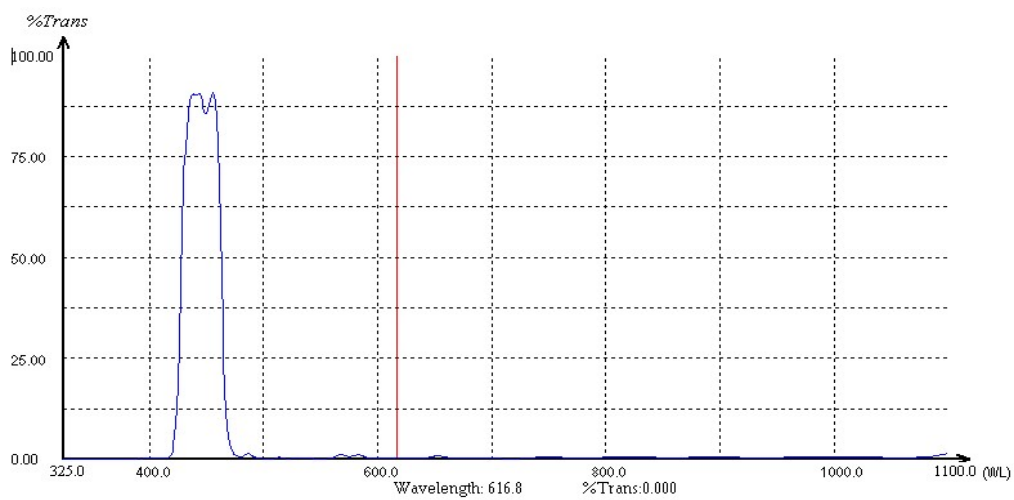

**Fig. S12** The light transmittance of the filter can reach about 90% in the range of 433nm~459nm.

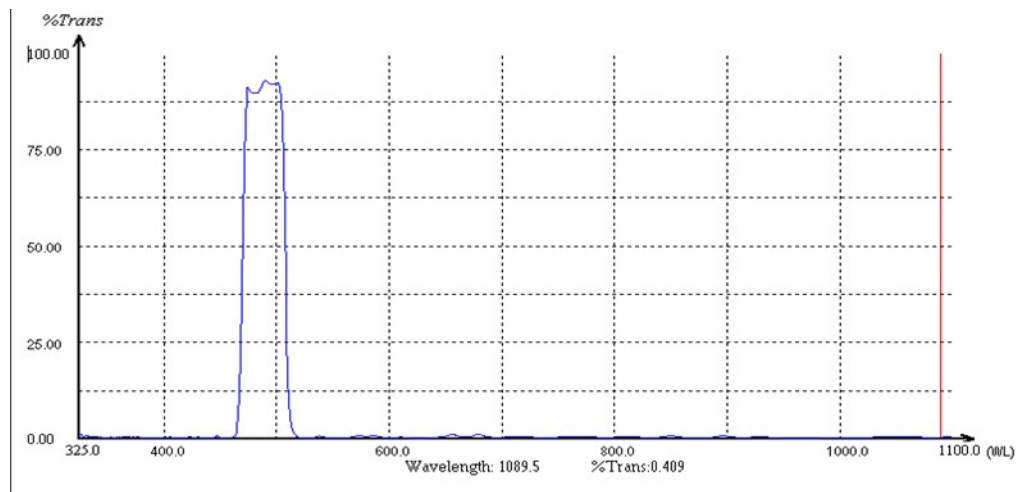

**Fig. S13** The light transmittance of the filter can reach about 90% in the range of 472nm~505nm.

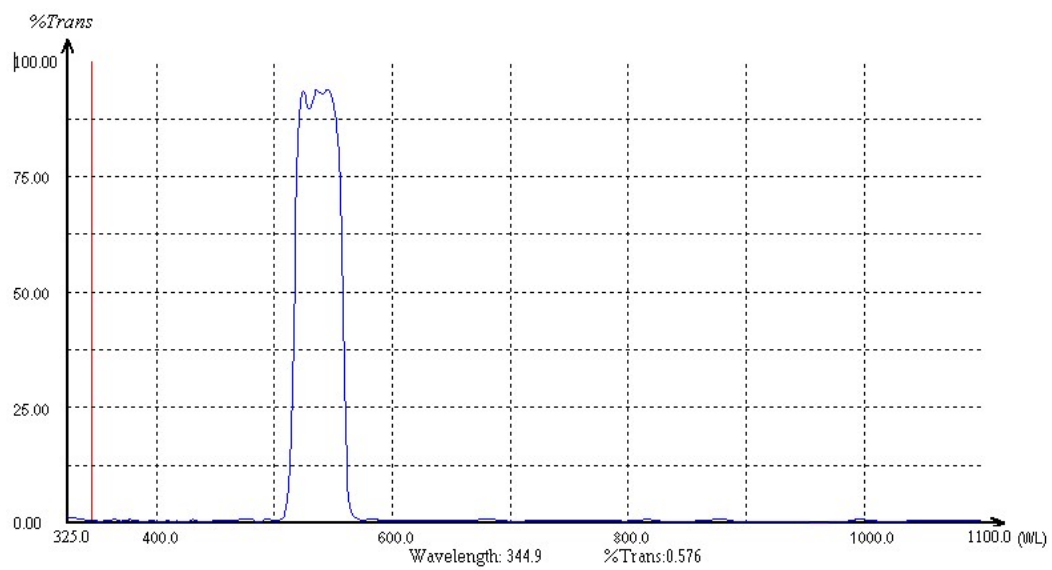

**Fig. S14** The light transmittance of the filter can reach about 90% in the range of 520nm~554nm.

## 1.7 Crystal structure information

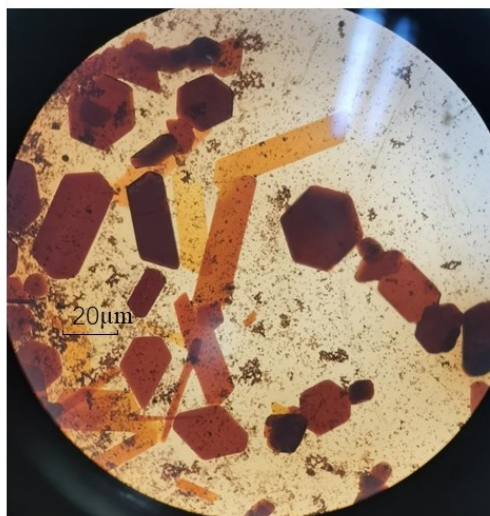

**Fig. S15.** The digital photo of the clusters I [ $\text{Mn}_4\text{Co}_2\text{O}_2(\text{Bu}^t\text{CO}_2)_{10}(\text{C}_5\text{H}_5\text{N})_4$ ]

**Table S1** Crystal and refinement data for clusters I

| Empirical formula     | $\text{C}_{70}\text{H}_{110}\text{Co}_2\text{Mn}_4\text{N}_4\text{O}_{22}$ |
|-----------------------|----------------------------------------------------------------------------|
| Formula weight        | 1697.23                                                                    |
| Temperature/K         | 293                                                                        |
| Crystal system        | orthorhombic                                                               |
| Space group           | Pbcn                                                                       |
| a/Å                   | 14.1256(5)                                                                 |
| b/Å                   | 23.1528(7)                                                                 |
| c/Å                   | 28.0634(7)                                                                 |
| $\alpha/^\circ$       | 90                                                                         |
| $\beta/^\circ$        | 90                                                                         |
| $\gamma/^\circ$       | 90                                                                         |
| Volume/Å <sup>3</sup> | 9178.1(5)                                                                  |
| Z                     | 4                                                                          |

|                                                |                                                               |
|------------------------------------------------|---------------------------------------------------------------|
| $\rho_{\text{calc}}/\text{g/cm}^3$             | 1.228                                                         |
| $\mu/\text{mm}^{-1}$                           | 7.624                                                         |
| F(000)                                         | 3552.0                                                        |
| Crystal size/ $\text{mm}^3$                    | $0.23 \times 0.12 \times 0.11$                                |
| Radiation                                      | Cu K $\alpha$ ( $\lambda = 1.54186$ )                         |
| 2 $\Theta$ range for data collection/ $^\circ$ | 7.636 to 139.25                                               |
| Index ranges                                   | $-12 \leq h \leq 17, -21 \leq k \leq 28, -14 \leq l \leq 34$  |
| Reflections collected                          | 22065                                                         |
| Independent reflections                        | 8249 [ $R_{\text{int}} = 0.0363, R_{\text{sigma}} = 0.0383$ ] |
| Data/restraints/parameters                     | 8249/555/506                                                  |
| Goodness-of-fit on $F^2$                       | 1.044                                                         |
| Final R indexes [ $I \geq 2\sigma(I)$ ]        | $R_1 = 0.0599, wR_2 = 0.1449$                                 |
| R indexes [all data]                           | $R_1 = 0.0841, wR_2 = 0.1618$                                 |

**Table S2** Atomic coordinates ( $\times 10^4$ ) and equivalent isotropic displacement arameters ( $\text{Å}^2 \times 10^3$ ) for clusters I.  $U(\text{eq})$  is defined as one third of the trace of the orthogonalized  $U_{ij}$  tensor.

|     | X          | Y          | Z          | $U(\text{eq})$ |
|-----|------------|------------|------------|----------------|
| Co1 | 5000       | 5906.7(3)  | 7500       | 29.0(2)        |
| Co2 | 5000       | 7118.4(3)  | 7500       | 29.1(2)        |
| Mn1 | 5818.3(5)  | 6351.4(3)  | 6508.9(2)  | 39.22(18)      |
| Mn2 | 3311.9(5)  | 6686.0(3)  | 6838.9(2)  | 38.94(18)      |
| O1  | 5224.4(18) | 6513.4(10) | 7935.9(9)  | 28.8(5)        |
| O2  | 6783(2)    | 7037.2(13) | 6654.8(11) | 48.9(8)        |
| O3  | 5267(2)    | 5496.0(12) | 6378.0(11) | 49.1(8)        |
| O4  | 4586(2)    | 5293.6(11) | 7070.2(10) | 42.1(7)        |
| O5  | 3524(2)    | 6349.1(14) | 6144.8(11) | 54.6(8)        |
| O6  | 3543(2)    | 5866.0(12) | 7831.2(10) | 39.5(6)        |
| O7  | 2622(2)    | 5992.3(13) | 7197.6(12) | 51.2(8)        |

---

|     |          |            |            |          |
|-----|----------|------------|------------|----------|
| O8  | 5028(2)  | 7728.9(11) | 7979.1(10) | 41.6(7)  |
| O9  | 4947(3)  | 6689.0(14) | 5961.3(11) | 53.4(8)  |
| O10 | 6596(2)  | 7166.6(12) | 7432.5(10) | 41.1(7)  |
| O11 | 6310(2)  | 7536.2(12) | 8414.7(11) | 48.1(8)  |
| N1  | 6814(3)  | 6150.8(18) | 5868.4(15) | 59.7(11) |
| N2  | 1807(3)  | 6912(2)    | 6536.9(16) | 59.6(11) |
| C1  | 2802(3)  | 5765.2(17) | 7593.4(16) | 40.4(9)  |
| C2  | 4730(13) | 8789(7)    | 8361(7)    | 87(4)    |
| C3  | 4942(8)  | 4428(3)    | 6015(3)    | 140(4)   |
| C4  | 5610(3)  | 7836.8(16) | 8308.8(15) | 40.7(9)  |
| C5  | 1462(6)  | 5076(4)    | 7416(3)    | 118(3)   |
| C6  | 7005(3)  | 7262.7(18) | 7042.5(16) | 40.9(9)  |
| C7  | 7697(8)  | 6016(4)    | 5004(3)    | 153(5)   |
| C8  | 4785(3)  | 5185.9(17) | 6642.7(16) | 42.9(10) |
| C9  | 5233(17) | 8868(6)    | 8244(6)    | 95(5)    |
| C10 | 4127(4)  | 6523.7(19) | 5852.2(17) | 51.8(11) |
| C11 | 835(6)   | 7513(4)    | 6052(3)    | 112(3)   |
| C12 | 5425(4)  | 8390(2)    | 8593.4(18) | 63.6(14) |
| C13 | 7786(8)  | 6504(4)    | 5247(3)    | 143(4)   |
| C14 | 2073(4)  | 5342(2)    | 7799(2)    | 59.5(13) |
| C15 | 3747(9)  | 5926(4)    | 5160(3)    | 148(4)   |
| C16 | 7855(4)  | 7682(2)    | 7046.9(19) | 57.2(12) |
| C17 | 5101.4   | 8213(7)    | 9078(4)    | 107(4)   |
| C18 | 4391(5)  | 4619(2)    | 6446(2)    | 70.8(16) |
| C19 | 397(5)   | 6554(4)    | 6189(3)    | 109(3)   |
| C20 | 3843(6)  | 6526(3)    | 5328(2)    | 79.9(17) |
| C21 | 2602(6)  | 4859(3)    | 8057(4)    | 125(3)   |
| C22 | 1614(5)  | 7414(3)    | 6334(3)    | 86(2)    |
| C23 | 4386(8)  | 4163(3)    | 6822(3)    | 136(4)   |

---

|     |          |         |         |        |
|-----|----------|---------|---------|--------|
| C24 | 7331(6)  | 6557(3) | 5676(2) | 96(3)  |
| C25 | 3370(6)  | 4764(4) | 6299(3) | 132(3) |
| C26 | 1190(5)  | 6496(3) | 6466(3) | 89(2)  |
| C27 | 7157(8)  | 5588(4) | 5189(3) | 150(5) |
| C28 | 8701(4)  | 7343(3) | 7203(3) | 102(2) |
| C29 | 4544(8)  | 6834(5) | 5024(3) | 142(3) |
| C30 | 8031(5)  | 7935(3) | 6551(2) | 97(2)  |
| C31 | 2897(8)  | 6842(5) | 5273(3) | 152(4) |
| C32 | 6757(6)  | 5669(3) | 5620(3) | 104(3) |
| C33 | 6386(9)  | 8698(6) | 8658(7) | 91(4)  |
| C34 | 222(5)   | 7073(4) | 5978(3) | 106(3) |
| C35 | 6178(13) | 8513(8) | 8952(7) | 105(4) |
| C36 | 7652(6)  | 8164(3) | 7398(3) | 100(2) |
| C37 | 4536(11) | 8251(7) | 8889(5) | 97(4)  |
| C38 | 1481(6)  | 5660(3) | 8145(3) | 119(3) |
| H2A | 4939.06  | 8877.59 | 8044.36 | 131    |
| H2B | 4684.17  | 9138.73 | 8543.53 | 131    |
| H2C | 4120.52  | 8605.9  | 8347.77 | 131    |
| H3A | 4901.18  | 4718.42 | 5771.92 | 210    |
| H3B | 4684.09  | 4071.93 | 5896.96 | 210    |
| H3C | 5593.34  | 4370.92 | 6101.28 | 210    |
| H5A | 1160.49  | 5375.82 | 7235.36 | 177    |
| H5B | 989.15   | 4835.09 | 7560.32 | 177    |
| H5C | 1849.97  | 4846.29 | 7207.86 | 177    |
| H7  | 7998.46  | 5968.82 | 4711.8  | 183    |
| H9A | 5777.54  | 8922.21 | 8044.38 | 143    |
| H9B | 5102.13  | 9218.48 | 8414.16 | 143    |
| H9C | 4697.14  | 8767.56 | 8050.7  | 143    |
| H11 | 732.01   | 7873.59 | 5915.63 | 135    |



---

|      |         |         |         |     |
|------|---------|---------|---------|-----|
| H13  | 8151.85 | 6805.47 | 5128.65 | 171 |
| H15A | 4341.44 | 5729.97 | 5194.99 | 221 |
| H15B | 3564.72 | 5926.05 | 4830.25 | 221 |
| H15C | 3272.28 | 5732    | 5344.79 | 221 |
| H17A | 4539.67 | 7982.27 | 9051.21 | 160 |
| H17B | 4966.43 | 8551.38 | 9264.41 | 160 |
| H17C | 5590.06 | 7992.73 | 9231.33 | 160 |
| H19  | -13.75  | 6244.94 | 6146.19 | 131 |
| H21A | 3038.86 | 4679.22 | 7840.69 | 187 |
| H21B | 2157.53 | 4577.2  | 8169.59 | 187 |
| H21C | 2943.73 | 5017.93 | 8322.02 | 187 |
| H22  | 2030.74 | 7719.03 | 6386.09 | 103 |
| H23A | 5015.74 | 4111.63 | 6942.64 | 204 |
| H23B | 4164.71 | 3806.42 | 6687.39 | 204 |
| H23C | 3973.34 | 4277.93 | 7076.56 | 204 |
| H24  | 7393.25 | 6903.62 | 5841.08 | 116 |
| H25A | 3037.07 | 4923.49 | 6566.23 | 198 |
| H25B | 3056.72 | 4417.97 | 6194.72 | 198 |
| H25C | 3379.02 | 5039.41 | 6043.47 | 198 |
| H26  | 1297.64 | 6142    | 6612    | 107 |
| H27  | 7064.31 | 5245.47 | 5022.35 | 180 |
| H28A | 8590.2  | 7188.56 | 7515.88 | 153 |
| H28B | 9246.04 | 7590.29 | 7210.54 | 153 |
| H28C | 8809.48 | 7031.75 | 6983.77 | 153 |
| H29A | 4667.14 | 7209.13 | 5155.12 | 213 |
| H29B | 4294.59 | 6874.64 | 4707.08 | 213 |
| H29C | 5121.89 | 6616.22 | 5012.36 | 213 |
| H30A | 8194.4  | 7629.61 | 6334.5  | 145 |
| H30B | 8541.38 | 8208.12 | 6566.34 | 145 |

---

|      |         |         |         |     |
|------|---------|---------|---------|-----|
| H30C | 7468.39 | 8125.15 | 6441.13 | 145 |
| H31A | 2429.94 | 6660.79 | 5472.24 | 228 |
| H31B | 2695.54 | 6824.82 | 4947    | 228 |
| H31C | 2971.14 | 7238.06 | 5367.22 | 228 |
| H32  | 6416.9  | 5363.6  | 5750.47 | 125 |
| H33A | 6849.71 | 8424.77 | 8766.96 | 137 |
| H33B | 6320.79 | 9001.25 | 8889.33 | 137 |
| H33C | 6584.77 | 8858.97 | 8359.59 | 137 |
| H34  | -309.09 | 7123.71 | 5786.28 | 128 |
| H35A | 6217.95 | 8197.9  | 9173.17 | 158 |
| H35B | 6026.89 | 8861.76 | 9119.91 | 158 |
| H35C | 6775.01 | 8557.97 | 8792.13 | 158 |
| H36A | 7113.95 | 8381.8  | 7291.88 | 149 |
| H36B | 8193.14 | 8414.24 | 7419.42 | 149 |
| H36C | 7521.99 | 8002.02 | 7706.25 | 149 |
| H37A | 4001.57 | 8210.35 | 8680.2  | 146 |
| H37B | 4419.57 | 8559.03 | 9110.36 | 146 |
| H37C | 4631.9  | 7897.19 | 9060.52 | 146 |
| H38A | 1877.78 | 5823.32 | 8387.7  | 179 |
| H38B | 1035.44 | 5399.36 | 8287.98 | 179 |
| H38C | 1146.59 | 5963.04 | 7983.58 | 179 |

---

---

**Table S3** Selected bond lengths (Å) for clusters **I**.

---

|                      |            |
|----------------------|------------|
| Co1-Co2              | 2.8053(11) |
| Co1-O1               | 1.889(2)   |
| Co1-O1 <sup>1</sup>  | 1.889(2)   |
| Co1-O4               | 1.953(3)   |
| Co1-O4 <sup>1</sup>  | 1.953(3)   |
| Co1-O6               | 2.260(3)   |
| Co1-O6 <sup>1</sup>  | 2.260(3)   |
| Co2-O1 <sup>1</sup>  | 1.886(2)   |
| Co2-O1               | 1.886(2)   |
| Co2-O8 <sup>1</sup>  | 1.951(3)   |
| Co2-O8               | 1.951(3)   |
| Co2-O10              | 2.264(3)   |
| Co2-O10 <sup>1</sup> | 2.265(3)   |
| Mn1-O1 <sup>1</sup>  | 2.177(3)   |
| Mn1-O2               | 2.132(3)   |
| Mn1-O3               | 2.160(3)   |
| Mn1-O6 <sup>1</sup>  | 2.346(3)   |
| Mn1-O9               | 2.119(3)   |
| Mn1-N1               | 2.330(4)   |
| Mn2-O1 <sup>1</sup>  | 2.199(3)   |
| Mn2-O5               | 2.120(3)   |
| Mn2-O7               | 2.131(3)   |
| Mn2-O10 <sup>1</sup> | 2.332(3)   |
| Mn2-O11 <sup>1</sup> | 2.160(3)   |
| Mn2-N2               | 2.348(4)   |

---
